# Supplementary material for: TLR4 Asp299Gly (rs4986790) polymorphism and coronary artery disease: a meta-analysis
Source: PeerJ journal article supplement (doi:10.7717/peerj.1412), 2015-11-26
Supplement: Supplemental_Article_S1.pdf [file Supplemental_Article_S1.pdf]

## Supplemental Article S1

### Association between Asp299Gly and the number of stenotic coronary arteries

*Study characteristic.* A total of five reports (Boekholdt et al., 2003; Yang, Holloway & Ye, 2003; Hernesniemi et al., 2006; Džumhur et al., 2012; Guven et al., 2015) were included, and NOS score of all studies was more than 6. By comparing the different genotype distribution in single-vessel, double-vessel, triple-vessel CAD with > 50% stenosis, the association between 299Gly and the severity of CAD could be speculated. Thus, we used single-vessel + double-vessel CAD vs. triple-vessel CAD to clarify the association of the frequency of AA and AG/GG with the number of stenotic vessels.

*Meta-analysis results.*  $P_Q = 0.95$ ,  $I^2 = 0.00\%$ , fixed-effects model was used; OR = 0.93, 95% CI = (0.69, 1.26),  $P = 0.64$ . Egger test:  $P = 0.08$ .

No significant difference was found between the genotype frequencies and the number of coronary arteries with > 50% stenosis. The main characteristics of the studies are listed in Table S1. Forest and funnel plots are shown in Fig. S1.

Table S1: Characteristics of studies about the association between Asp299Gly and the number of stenotic coronary arteries.

| Study            | AA (number of stenosis vessels) |     |     | AG+GG (number of stenosis vessels) |    |    |
|------------------|---------------------------------|-----|-----|------------------------------------|----|----|
|                  | 1                               | 2   | 3   | 1                                  | 2  | 3  |
| Yang,2003        | 393                             | 319 | 254 | 48                                 | 34 | 30 |
| Dzumhur,2012     | 26                              | 24  | 31  | 7                                  | 3  | 4  |
| Guven,2015       | 45                              | 42  | 53  | 5                                  | 2  | 3  |
| Boekholdt,2003   | 249                             | 195 | 131 | 32                                 | 29 | 17 |
| Hernesniemi,2006 | *                               | 164 | 61  | *                                  | 29 | 9  |

\*Due to the raw data of the study “J. Hernesniemi, 2006”, we could only get the AA/AG+GG genotype frequencies of 1-vessel+2-vessel CAD.

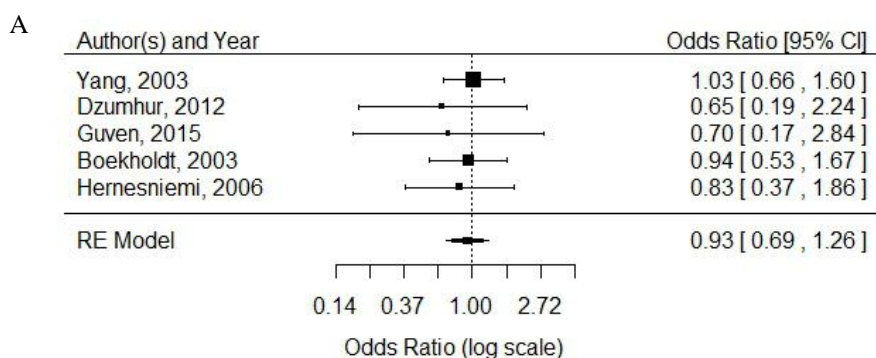

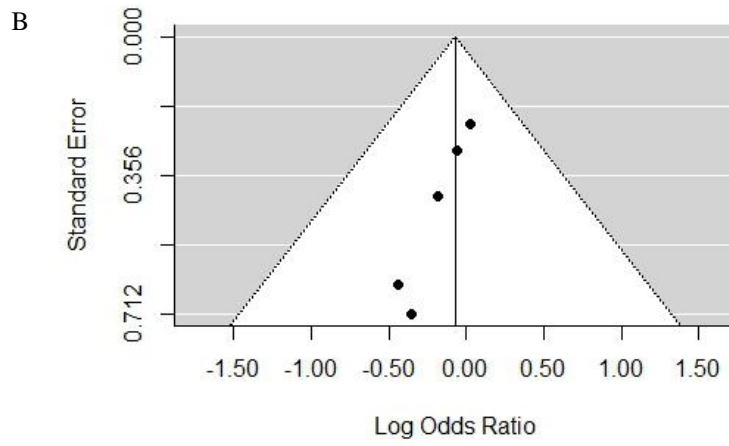

Figure S1: Forest and Funnel plots of the association between TLR4 gene Asp299Gly polymorphism and the number of stenotic coronary arteries. A and B (Forest and Funnel plots for 1-vessel+2-vessel vs. 3-vessel); C and D (Forest and Funnel plots for 1-vessel+2-vessel+3-vessel vs. 3-vessel).
