# Supplementary material for: TLR4 Asp299Gly (rs4986790) polymorphism and coronary artery disease: a meta-analysis
Source: PeerJ journal article supplement (doi:10.7717/peerj.1412), 2015-11-26
Supplement: Supplemental_Article_S2.pdf [file Supplemental_Article_S2.pdf]

## Supplemental Article S2

### Synergistic effect of statin and Asp299Gly

*Study characteristics.* Boekholdt et al. (Boekholdt et al., 2003) was the first to demonstrate that 299Gly modified the efficacy of statin in preventing cardiovascular events, such that carriers of the variant allele had significantly more benefit from statin treatment. However, other reports found no association between 299Gly carriers and the incidence of cardiovascular events in statin-treated patients (Kolek et al., 2004; Beijk et al., 2010). The incidence of cardiovascular events according to TLR4 genotype and statin is shown in Table S2. Two groups (statin\_AA v.s statin\_AG/GG, no statin\_AA v.s no statin\_AG/GG) were used to clarify the synergistic effect of statin and 299Gly.

*Meta-analysis results.* statin\_AA v.s statin\_AG/GG:  $P_Q = 0.05$ ,  $I^2 = 67.45\%$ , random-effects model was used; OR = 1.12, 95% CI = (0.41, 3.09),  $p = 0.82$ . Egger test:  $p = 1.00$ .

no statin\_AA v.s no statin\_AG/GG:  $P_Q = 0.14$ ,  $I^2 = 48.82\%$ , fixed-effects model was used; OR = 0.80, 95% CI = (0.51, 1.25),  $p = 0.33$ . Egger test:  $p = 1.00$ .

No synergistic effect of statin and Asp299Gly was found. Because of the low number of articles included and large heterogeneity, the result should be confirmed by more high-quality studies in future. Forest plots for the incidence of cardiovascular events according to TLR4 genotype and statin are shown in Fig. S2.

Table S2: Characteristics of studies about the incidence of cardiovascular events according to TLR4 genotype and statin.

| Study          | Statin |      |       |     | No-Statin |      |       |     |
|----------------|--------|------|-------|-----|-----------|------|-------|-----|
|                | AA     |      | AG/GG |     | AA        |      | AG/GG |     |
|                | I      | T    | I     | T   | I         | T    | I     | T   |
| Boekholdt,2003 | 32     | 278  | 1     | 51  | 54        | 299  | 8     | 27  |
| Kolek,2004     | 61     | 285  | 8     | 22  | 391       | 1437 | 37    | 147 |
| Beijk,2010     | 134    | 1285 | 16    | 176 | 90        | 1059 | 20    | 162 |

I: Incidence; T: Total.

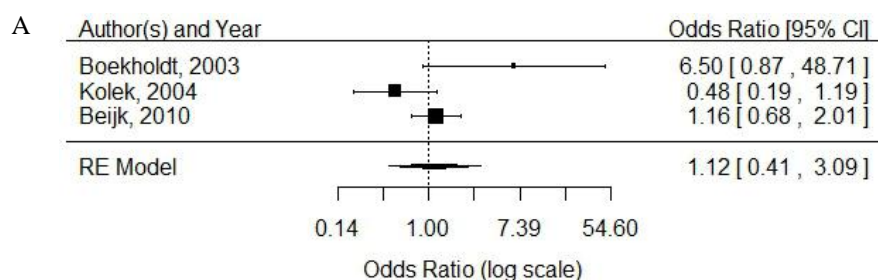

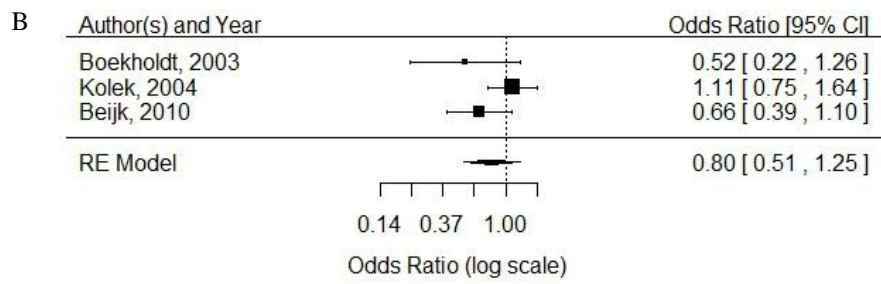

Figure S2: Forest plots for the incidence of cardiovascular events according to TLR4 genotype and statin treatment. A (Statin\_AA v.s Statin\_AG/GG); B (No Statin\_AA v.s No Statin\_AG/GG).
